# Supplementary material for: Risk of Atrial Fibrillation in Patients with Different Cancer Types in Taiwan
Source: MDPI journal article supplement (doi:10.3390/life14050621), 2024-05-11
Supplement: s1 [file s1]

**Supplemental Table S1.** International Classification of Diseases for Oncology, 3rd Edition (ICD-O-3) for cancers and International Classification of Diseases, Ninth Revision, Clinical Modification (ICD-9-CM) and Ten Revision, Clinical Modification (ICD-10-CM) Diagnosis for comorbidities.

|                                                        | ICD-3-O      | ICD-9-CM | ICD-10-CM           |
|--------------------------------------------------------|--------------|----------|---------------------|
| <b>Cancer</b>                                          | C00-C80      |          |                     |
| Esophageal                                             | C15          |          |                     |
| Lung                                                   | C33-C34      |          |                     |
| Gallbladder and extrahepatic bile ducts                | C23-C24      |          |                     |
| Male Genital Organs                                    | C60-C63      |          |                     |
| Skin                                                   | C44          |          |                     |
| Pancreatic                                             | C25          |          |                     |
| Bladder                                                | C67          |          |                     |
| Gastric                                                | C16          |          |                     |
| Kidney                                                 | C64-C66, C68 |          |                     |
| Malignant neoplasm of thymus heart and mediastinum     | C37-C38      |          |                     |
| Liver                                                  | C22          |          |                     |
| Colorectal                                             | C18-C21      |          |                     |
| Malignant neoplasm of connective and other soft tissue | C47, C49     |          |                     |
| Small intestine                                        | C17          |          |                     |
| Peritoneum                                             | C26, C48     |          |                     |
| Eye                                                    | C69          |          |                     |
| CNS cancer                                             | C70-C72      |          |                     |
| Head and Neck                                          | C00-C14      |          |                     |
| Bone                                                   | C40-C41      |          |                     |
| Breast                                                 | C50          |          |                     |
| Gynecologic                                            | C51-C58      |          |                     |
| Thyroid                                                | C73          |          |                     |
| <b>Outcome</b>                                         |              |          |                     |
| Atrial fibrillation                                    |              | 427.31   | I48.0-I48.2, I48.91 |

|                                              | ICD-3-O | ICD-9-CM                                | ICD-10-CM                                    |
|----------------------------------------------|---------|-----------------------------------------|----------------------------------------------|
| <b>Comorbidity</b>                           |         |                                         |                                              |
| Hypertension                                 |         | 401-405                                 | I10-I15                                      |
| Diabetes                                     |         | 250                                     | E10-E14                                      |
| Stroke                                       |         | 430-438, 362.34                         | G45-G46, I60-I69, H34.0                      |
| Peripheral arterial occlusion disease (PAOD) |         | 093.0, 437.3, 437.1, 440, 441, 443.1-   | I70, I71, I73.1, I73.8, I73.9, I77.1, I79.0, |
|                                              |         | 443.9, 444.22, 444.8, 447.1, 447.8,     | I79.2, K55.1, K55.8, K55.9, Z95.8,           |
|                                              |         | 447.9, 471, 557.1, 557.9                | Z95.9                                        |
|                                              |         | 428, 435.4-435.9, 398.91, 402.01,       | I43, I50, I09.9, I11.0, I13.0, I13.2, I25.5, |
| Heart failure                                |         | 402.11, 402.91, 404.01, 404.03, 404.11, | I42.0, I42.5-I42.9, P29.0                    |
|                                              |         | 404.13, 404.91, 404.93                  |                                              |
| Myocardial infarction                        |         | 410 412                                 | I21 I22 I25.2                                |
| End stage renal disease (ESRD)               |         | 585.5, 585.6                            | N18.6                                        |
